# Supplementary material for: Consensus Statement on the definition and classification of metabolic hyperferritinaemia
Source: Springer Nature journal article supplement (doi:10.1038/s41574-023-00807-6), 2023-02-17
Supplement: MOESM1 [file 41574_2023_807_MOESM1_ESM.pdf]

# Consensus Statement on the definition and classification of metabolic hyperferritinaemia

---

In the format provided by the  
authors and unedited

# **CONSENSUS STATEMENT ON THE DEFINITION AND CLASSIFICATION OF METABOLIC HYPERFERRITINAEMIA**

## **SUPPLEMENTARY DATA**

Luca Valenti, Elena Corradini,  
Leon Adams, Elmar Aigner, Saleh Alqahtani, Marco Arrese, Edouard Bardou-Jacquet,  
Elisabetta Bugianesi, Jose-Manuel Fernandez-Real, Domenico Girelli, Hannes Hagström,  
Benjamin Henninger, Kris Kowdley, Guido Ligabue, Donald McClain, Fabrice Laine, Koji  
Miyanishi, Martina U. Muckenthaler, Alessia Pagani, Patrizia Pedrotti, Antonello Pietrangelo,  
Daniele Prati, John D. Ryan, Laura Silvestri, C. Wendy Spearman, Per Stål, Emmanuel A  
Tsochatzis, Francesca Vinchi, Ming-Hua Zheng, Heinz Zoller.

## SUPPLEMENTARY TEXT

### SUPPLEMENTARY BOX 1

#### ***Noninvasive assessment of tissue iron***

Magnetic resonance imaging (MRI) has emerged as the dominant non-invasive imaging modality to quantify hepatic iron content (technically referred to as HIC) <sup>1</sup>. Clinical MRI is based on a characteristic feature of the hydrogen nucleus, consisting of a single proton with a magnetic property called spin, which in specific conditions can absorb energy from radiofrequency pulses. The rate at which the energy absorbed is dissipated to return to the equilibrium once the radiofrequency pulse is interrupted generates a signal, which can be measured to produce an image. The parameters used to describe this process are called relaxation times T1, T2 and T2\*. T2 and T2\* are of particular interest because they are both decreased in presence of superparamagnetic molecules such as ferritin and haemosiderin, which have a component of iron. As a result, the MRI signal decays faster in iron overloaded organs, and MR images the presence of iron in a tissue indirectly, through its influence on the acceleration of signal decay in surrounding protons <sup>1</sup>. Various MRI techniques have been developed for iron quantification; nowadays the relaxometry technique is considered the standard of care <sup>2,3</sup>. Relaxometry is based on the quantification of relaxation time T2 or T2\* in milliseconds, by measuring signal decay at various echo times. Often, the reciprocal of the relaxation times T2 and T2\*, R2 and R2\* respectively (in Hz) are used ( $R2 = 1/T2$ ;  $R2^* = 1/T2^*$ ). R2 and R2\* are both directly proportional to liver iron concentration, whilst T2 and T2\* are inversely proportional. Relaxometry techniques are robust, vendor-independent and produce highly accurate non-invasive estimates of hepatic iron. Iron calibration curves are available, correlating tissue iron concentration to liver R2 and R2\*<sup>4-7</sup>. In patients with liver disease, various pathologic changes can be present simultaneously, including liver fat, iron, inflammation, biliary disease, and fibrosis <sup>8</sup>. Moreover, the coexistence of several pathologic changes may act as a confounder to liver iron quantification, so a future direction would be the development of multiparametric techniques, to assess each of the pathologic components and control for biologic confounders. Particularly, in patients with fatty liver, the study protocol could include multi-echo chemical shift–encoded gradient-echo sequences for simultaneous assessment of proton-density fat fraction (PDFF) for liver steatosis quantification and T2\* (or R2\*) for liver iron quantification within a single breath hold <sup>9-11</sup>. PDFF provides validated assessment of liver steatosis <sup>12</sup>, and in the end a multiparametric approach could be more cost-effective for the management of complex liver disease.

Unlike conventional treatment strategies, non-invasive imaging diagnosis, therapeutic functions and clinical outcome monitoring could be seamlessly unified in iron theranostics, thereby enabling opportunities to simultaneously quantify and deplete focal iron for dysmetabolic hyperferritinemia. For example, in a proof of principle study clinically used indocyanine green was successfully repurposed as iron theranostics to diagnose and deplete deposited iron in genetic murine models with iron-overload disorders and in a small initial cohort of patients with liver disease <sup>13</sup>.

## SUPPLEMENTARY BOX 2

### ***Iron accumulation, activation of the BMP-SMAD pathway, modulation of lipid metabolism and cellular damage in hepatocytes***

Hepatocytes are central to iron, glucose and lipid metabolism and sustain the interaction of the corresponding metabolic pathways. All these biochemical processes require iron, or its derivatives Fe-S clusters or heme, as cofactors for the function of several key enzymes. For example, iron overload can affect the activity of many hepatic enzymes involved in cholesterol metabolism and can impair desaturation of saturated and essential fatty acids by modulating stearoyl CoA desaturase (SCD) <sup>14</sup>. Iron also regulates glucose homeostasis in both liver and muscle via AMP-activated protein kinase <sup>15</sup>, and heme controls the circadian hepatic glucose metabolism in mice <sup>16</sup>. Accumulation of free cytosolic iron leads to oxidative stress, as in mice with *Pcbp1* genetic inactivation in hepatocytes <sup>17</sup>. It also affects mitochondrial function through the generation of reactive oxygen species (ROS) and it increases lipid biosynthetic pathways. Free cytosolic iron activates also ferroptosis, a newly discovered form of regulated cell death characterized by iron-dependent accumulation of lipid peroxides <sup>18,19</sup>, that represents the main driver of hepatocyte damage and steatohepatitis in murine NASH <sup>20</sup>. Induction of ferroptosis has been reported to worsen fibrogenesis in models of liver disease <sup>21</sup>.

The increased iron level in macrophages in MHF patients may trigger the polarization of these cells towards a pro-inflammatory phenotype <sup>22-24</sup>. Importantly, iron-driven inflammatory phenotypic switching of macrophages promotes fibrosis development <sup>24</sup>. Accordingly, iron deposition in the liver resident macrophages (Kupffer cells) has been associated with NASH and advanced fibrosis in patients with NAFLD <sup>25</sup>, while mice on low iron are protected from NASH <sup>26</sup>. It should however be mentioned that, although severe suppression of the BMP-SMAD pathway and hepcidin release lead to severe iron overload and fibrosis <sup>27</sup>, activation of BMP-SMAD by hepatic iron accumulation ameliorated steatosis in mice due to increased lipolysis and downregulation of PPAR $\gamma$  signaling <sup>28</sup>.

### SUPPLEMENTARY BOX 3

#### ***Iron and vascular damage***

Epidemiological studies suggest that dietary intake of heme iron is associated with an increased risk of cardiovascular disease <sup>29</sup>. Iron retention in macrophages as well as vascular cells might play a role also in the development of cardiovascular disease in MHF through the formation of foam cells, alterations of the vascular walls, and vascular stiffness <sup>30,31</sup>. Patients with metabolic alterations often show hypertension and increased arterial stiffness, which predispose to cardiovascular disease. Interestingly, hyperferritinemia is associated with aggravated aortic stiffness and cardiac diastolic dysfunction <sup>32,33</sup>, suggesting an interaction between iron dys-homeostasis and altered cardiovascular functions. Interestingly, serum ferritin has been described as a potentially imprinting factor given its association with carotid intima media thickness in offspring of fathers (but not mothers) with increased serum ferritin levels <sup>34</sup>. Overall, iron overload increases the vasoconstrictor response of arteries, associated with altered vascular reactivity and the loss of endothelial modulation of the vascular tone <sup>30,35</sup>. Hepcidin-induced iron accumulation has been shown to drive vascular smooth muscle cell proliferation, contributing to vascular remodeling and pulmonary hypertension <sup>30,36</sup>. In addition, hepcidin-mediated intracellular iron trapping in macrophages results in exacerbated inflammation and impaired cell cholesterol handling, due to enhanced CD36-mediated cholesterol uptake and decreased ABCA1/ABCG1-mediated reverse cholesterol efflux. These mechanisms likely promote foam cells formation within vascular lesions and plaque destabilization through inflammatory cytokine release, intracellular lipid loading, oxidative stress, and cell apoptosis <sup>30,37-39</sup>. Accordingly, hyperferritinemia, hepcidin levels and macrophage iron positively correlate with IL-6 and MCP-1 levels and the presence of carotid plaques in individuals with metabolic syndrome and NAFLD <sup>40,41</sup>.

## SUPPLEMENTARY TABLES

**Supplementary Table 1.** Main recommendations presented in the manuscript and consensus reached among authors.

| #   | Recommendation                                                                                                                                                                                                                                                                                                                                                                                                                                                                                                                 | Consensus | Total | Partial | Neutral | Limited | No |
|-----|--------------------------------------------------------------------------------------------------------------------------------------------------------------------------------------------------------------------------------------------------------------------------------------------------------------------------------------------------------------------------------------------------------------------------------------------------------------------------------------------------------------------------------|-----------|-------|---------|---------|---------|----|
| 1.  | Insulin resistance and features of the metabolic dysfunction are associated with specific alterations of iron metabolism regulation, which are epidemiologically linked with organ damage and clinical outcomes.                                                                                                                                                                                                                                                                                                               | 100%      | 80    | 17      | 3       |         |    |
| 2.  | The pathophysiology of this alteration of iron metabolism regulation seems triggered by lipotoxicity in the presence of permissive environmental and genetic determinants, but additional studies are required to clarify the contribution of subclinical inflammation and the underlying mechanisms and implications.                                                                                                                                                                                                         | 100%      | 71    | 26      | 3       |         |    |
| 3.  | We propose as the most accurate and available biomarker to non-invasively capture and grade the presence of the aforementioned iron metabolism alteration, associated with glucose and lipid metabolism dysregulation and with hepatic fat accumulation, serum ferritin (SF).                                                                                                                                                                                                                                                  | 97%       | 68    | 26      | 3       | 3       |    |
| 4.  | We propose to define this condition as “Metabolic hyperferritinemia” (MHF), and to grade its severity according to SF levels thresholds (grade 1 to 3), which will need prospective validation and optimization. When possible, SF levels should be evaluated after at least 3 months of lifestyle changes.                                                                                                                                                                                                                    | 100%      | 83    | 17      |         |         |    |
| 5.  | As criteria for “Metabolic dysfunction”, we propose those matching the definition of “Metabolic dysfunction associated fatty liver disease” (MAFLD), with the following modifications: inclusion of the presence of fatty liver among the criteria, exclusion of those with biochemical signs of overt inflammation and of heavy alcohol intake.                                                                                                                                                                               | 93%       | 90    | 3       |         | 7       |    |
| 6.  | Given the initial evidence that in stable patients with MHF, SF may be associated with tissue iron accumulation, we suggest to non-invasively estimate hepatic iron concentration by MRI in clinical studies. This can be considered, when available, in pathophysiological studies and in clinical practice in patients with higher SF (grade 2, but in particular grade 3) and/or additional clinical risk factors for iron overload. When available, tissue iron concentration should have the priority on SF to grade MHF. | 97%       | 74    | 23      |         | 3       |    |
| 7.  | We propose to define the presence of “Dysmetabolic iron overload syndrome” (DIOS) in patients with MHF and increased hepatic iron stores, as evaluated by $R2^* > 140$ 1/s or direct evidence of increased hepatic iron stores.                                                                                                                                                                                                                                                                                                | 100%      | 74    | 26      |         |         |    |
| 8.  | Liver biopsy is not required for the diagnosis of MHF and of DIOS, unless otherwise indicated for the management of associated liver disease or for specific research purposes.                                                                                                                                                                                                                                                                                                                                                | 100%      | 93    | 7       |         |         |    |
| 9.  | The clinical management should be focused on the correction of overweight and lifestyle factors associated with increased risk of cardiometabolic risk factors (e.g. dietary caloric intake and pattern, alcohol, fructose and salt intake, sedentary lifestyle) and the pharmacological control of cardiovascular risk factors.                                                                                                                                                                                               | 100%      | 93    | 7       |         |         |    |
| 10. | In patients with MHF and DIOS, iron depletion (ID) therapy should be considered as an experimental therapy to be tested in well-powered controlled trials.                                                                                                                                                                                                                                                                                                                                                                     | 100%      | 70    | 23      | 7       |         |    |
| 11. | Additional studies are required to define the specific genetic and environmental risk factors for MHF and DIOS development.                                                                                                                                                                                                                                                                                                                                                                                                    | 100%      | 100   |         |         |         |    |
| 12. | Blood donation is not contraindicated in individuals with MHF with controlled cardiovascular risk factors, in the absence of organ damage and of other contraindications to phlebotomy.                                                                                                                                                                                                                                                                                                                                        | 100%      | 93    | 7       |         |         |    |
| 13. | Additional studies are required to define the correlation between SF levels and hepatic iron content determined by MRI in patients with MHF.                                                                                                                                                                                                                                                                                                                                                                                   | 100%      | 87    | 10      | 3       |         |    |
| 14. | Additional studies are required to investigate whether MHF and/or mild tissue iron accumulation in the liver, adipose tissue and other organs are causally involved in the pathogenesis of insulin resistance, liver disease and other chronic degenerative conditions associated with MHF.                                                                                                                                                                                                                                    | 100%      | 93    | 7       |         |         |    |
| 15. | Clinical studies evaluating ID in MHF/DIOS patients should consider as main outcomes biomarkers more closely linked to clinical events and take into account the perceived quality of life, which should be assessed after an adequate duration of follow-up, at least 3 months after ID achievement in the active arm.                                                                                                                                                                                                        | 97%       | 61    | 33      | 3       | 3       |    |

**Supplementary Table 2.** Differential diagnosis of metabolic hyperferritinemia (MHF).

| COMMON DISORDERS                |                                                                                                                                                                                                                                                                                        |
|---------------------------------|----------------------------------------------------------------------------------------------------------------------------------------------------------------------------------------------------------------------------------------------------------------------------------------|
| Inflammatory disorders          | Infections, including viral infections (e.g. COVID-19).                                                                                                                                                                                                                                |
|                                 | Sepsis, SIRS, MOF, MAS.                                                                                                                                                                                                                                                                |
|                                 | Connective tissue and other autoimmune disorders, including inflammatory arthritis.                                                                                                                                                                                                    |
|                                 | End stage renal disease and dialysis.                                                                                                                                                                                                                                                  |
| Alcohol abuse                   | Alcoholic steatohepatitis, chronic alcohol use disorder.                                                                                                                                                                                                                               |
| Liver disease                   | Acute and chronic liver damage (acute and acute on chronic liver failure, acute and chronic hepatitis).                                                                                                                                                                                |
| Neoplasia                       | Lymphoproliferative disorders, some forms of solid cancer, disseminated neoplasia.                                                                                                                                                                                                     |
| Myelodysplastic syndromes (MDS) | Hyperferritinemia due to ineffective erythropoiesis, RBC transfusions, and/or blast-derived inflammatory cytokines <sup>42</sup> . Refractory anemia with ring sideroblasts (RARS) is the MDS-form with the highest values of iron parameters before the onset of transfusion therapy. |
| Hemolytic disorders             | Acquired hemolytic anemias.                                                                                                                                                                                                                                                            |
| RARE AND GENETIC DISORDERS      |                                                                                                                                                                                                                                                                                        |
|                                 | Hemochromatosis and other iron metabolism disorders (e.g. Ferroportin disease, aceruloplasminemia).                                                                                                                                                                                    |
|                                 | Thalassemias, dyserythropoietic, sideroblastic and hemolytic anemias and other RBC disorders (e.g. RBC membrane and enzymatic defects) <sup>43</sup> .                                                                                                                                 |
|                                 | Lysosomal storage disorders (e.g. Gaucher disease) <sup>44,45</sup> .                                                                                                                                                                                                                  |
|                                 | Hereditary hyperferritinemia with or without cataract <sup>46</sup> .                                                                                                                                                                                                                  |

SIRS: systemic inflammatory response syndrome; MOF: multiorgan failure; MAS: macrophage activation syndrome, RBC: red blood cells.

**Supplementary Table 3.** Proposed clinical assessment in patients with metabolic hyperferritinemia (MHF; for clinical and research purposes). These may not be indicated for all patients in clinical practice but can be considered based on the individual history and presentation features.

| CLINICAL                                                          |                                                                                                                                                                                                                                                                                                                                                                                                                             |
|-------------------------------------------------------------------|-----------------------------------------------------------------------------------------------------------------------------------------------------------------------------------------------------------------------------------------------------------------------------------------------------------------------------------------------------------------------------------------------------------------------------|
| Clinical history                                                  | Family history of iron metabolism, erythropoiesis, cardiometabolic, neoplastic and liver disorders; history of metabolic, erythropoiesis, neoplastic, liver and inflammatory disorders, drugs, iron supplementation, RBC transfusion.                                                                                                                                                                                       |
| Lifestyle factors                                                 | Alcohol intake (amount and pattern), physical activity, dietary pattern, use of dietary supplements, environmental exposures.                                                                                                                                                                                                                                                                                               |
| Anthropometric parameters                                         | Height, weight, BMI, abdominal circumference.                                                                                                                                                                                                                                                                                                                                                                               |
| BIOCHEMICAL                                                       |                                                                                                                                                                                                                                                                                                                                                                                                                             |
| Iron status                                                       | Serum iron, transferrin, transferrin saturation %, ferritin.                                                                                                                                                                                                                                                                                                                                                                |
| Cofactors                                                         | Ceruloplasmin levels, electrophoresis.                                                                                                                                                                                                                                                                                                                                                                                      |
| Inflammation                                                      | CRP, autoimmunity markers if strong clinical suspicion.                                                                                                                                                                                                                                                                                                                                                                     |
| Red blood cells                                                   | Complete blood count with formula; LDH, bilirubin, haptoglobin and reticulocytes if clinical suspicion of hemolysis; hemoglobin electrophoresis if clinical suspicion of beta-thalassemia or other hemoglobinopathies carriage; blood smear, hemolysis markers and/or hematological referral if clinical suspicion of RBC defects, dyserythropoietic or sideroblastic anemias, or myelodysplastic syndromes <sup>47</sup> . |
| Liver damage                                                      | AST, ALT, GGT, FIB-4 score.                                                                                                                                                                                                                                                                                                                                                                                                 |
| CANCER SCREENING                                                  |                                                                                                                                                                                                                                                                                                                                                                                                                             |
|                                                                   | According to screening guidelines, but keep higher index of suspicion, rule out in the presence of risk factors.                                                                                                                                                                                                                                                                                                            |
| IMAGING                                                           |                                                                                                                                                                                                                                                                                                                                                                                                                             |
| Upper abdominal ultrasound                                        | To evaluate fatty liver, signs of liver disease and spleen size.                                                                                                                                                                                                                                                                                                                                                            |
| Transient elastography (e.g. Fibroscan)                           | To screen for fatty liver by CAP, to stage liver disease severity by LSM when FIB-4>1.3, to monitor steatosis and liver damage.                                                                                                                                                                                                                                                                                             |
| Abdominal MRI                                                     | To estimate hepatic iron content (by R2*; possibly converted to $\mu\text{mol/g}$ ); association with cardiac or spleen iron presently unknown. If available, simultaneous assessment of proton-density fat fraction (PDFF) for liver steatosis.                                                                                                                                                                            |
| LIVER BIOPSY                                                      |                                                                                                                                                                                                                                                                                                                                                                                                                             |
|                                                                   | To rule out NASH and stage liver damage for clinical trials; in the presence of liver damage more severe than expected to rule out concurrent etiology; to stage fibrosis (advanced fibrosis) when non-invasive assessment is indeterminate for HCC surveillance.                                                                                                                                                           |
| GENETICS                                                          |                                                                                                                                                                                                                                                                                                                                                                                                                             |
| Common <i>HFE</i> variants*                                       | Family history and/or persistently increased TS% especially in Caucasian patients <sup>48</sup> .                                                                                                                                                                                                                                                                                                                           |
| Rare <i>HFE</i> variants and other hemochromatosis genes variants | Family history and/or persistently increased TS% especially in juvenile or severe phenotypes, non-Caucasian patients, or in the absence of <i>HFE</i> common variants <sup>48</sup> .                                                                                                                                                                                                                                       |
| <i>SERPINA1</i> variants                                          | Family history, altered alpha-1 fraction at electrophoresis or reduced circulating A1AT.                                                                                                                                                                                                                                                                                                                                    |
| <i>CERULOPLASMIN</i> variants                                     | Reduced circulating CP, family history, low transferrin saturation with severe stores, and the possible presence of anemia, microcytosis, diabetes                                                                                                                                                                                                                                                                          |



|                      |                                                                 |
|----------------------|-----------------------------------------------------------------|
|                      | and neurologic complications.                                   |
| <i>FPN1</i> variants | Family history of iron overload (AD).                           |
| Iron genes panel**   | Severe iron accumulation (Grade 3 MHF, DIOS) <sup>49,50</sup> . |

Abbreviations: AD: autosomal dominant; AAT: alpha1-antitrypsin; ALT: alanine aminotransferase; AST: aspartate aminotransferase; BMI: body mass index; CAP: continuous attenuation parameter; CP: ceruloplasmin; GGT: gamma-glutamyltransferase; HCC: hepatocellular carcinoma; LSM: liver stiffness measurement; MRI: magnetic resonance imaging; NASH: nonalcoholic steatohepatitis; TS%: percentage of transferrin saturation.

\* In spite of the reported associations of *HFE* variants with increased ferritin and progression to DIOS, currently there is no demonstration of clinical utility of *HFE* genotyping in these patients because by itself it is not sufficient to identify patients with excessive hepatocellular iron.

\*\*When available and / or for research purposes; demonstration of increased tissue body iron stored is advised before evaluation of genetic predisposition outside the research setting.



**Supplementary Table 4.** Clinical correlates of ferritin levels and hepatic iron stores in individuals with metabolic dysfunction.

| <i>Outcomes</i>        | <i>Main results</i>                                                                                                                                                                                                    |
|------------------------|------------------------------------------------------------------------------------------------------------------------------------------------------------------------------------------------------------------------|
| TYPE 2 DIABETES        | Hepatic iron and ferritin associated with more severe insulin resistance and metabolic syndrome <sup>40,51-56</sup>                                                                                                    |
|                        | Ferritin predicts higher incidence of type 2 diabetes <sup>57-59</sup>                                                                                                                                                 |
|                        | Ferritin and iron supplementation predict gestational diabetes mellitus <sup>60-62</sup>                                                                                                                               |
| CARDIOVASCULAR DISEASE | Ferritin associated with carotid damage and vascular stiffness <sup>32,33,40</sup>                                                                                                                                     |
|                        | Hepcidin associated with inflammation and vascular damage <sup>41</sup>                                                                                                                                                |
| LIVER DISEASE          | Hepatic siderosis (predominantly non-parenchymal or mixed) associated with nonalcoholic steatohepatitis (NASH) and fibrosis in patients with nonalcoholic fatty liver disease (NAFLD) in some studies <sup>63-65</sup> |
|                        | Genetic variants favoring hepatic iron deposition associated with liver fibrosis, cirrhosis and hepatocellular carcinoma <sup>49,66</sup>                                                                              |
|                        | Genetically predicted increase in liver iron level associated with an increased risk of MAFLD (Mendelian randomization approach to assess causality) <sup>67</sup>                                                     |
|                        | Hepcidin associated with liver damage and hyperferritinemia <sup>68</sup>                                                                                                                                              |
|                        | Liver iron (non-parenchymal or mixed) associated with hepatocellular carcinoma <sup>69</sup>                                                                                                                           |
|                        | Liver iron associated with worse clinical hepatic and cardiovascular outcomes in nonalcoholic fatty liver disease <sup>70</sup>                                                                                        |
| KIDNEY DISEASE         | Ferritin and hepatic iron associated with microalbuminuria and kidney disease in type 2 diabetes <sup>71,72</sup>                                                                                                      |
| MORTALITY              | Higher overall and cardiovascular mortality in men without severe chronic diseases <sup>73</sup>                                                                                                                       |

**Supplementary Table 5.** Main controlled studies reporting the impact of iron depletion by phlebotomy in individuals with metabolic hyperferritinemia (MHF).

| <i>Study</i>                        | <i>Design</i>                             | <i>Sample</i>                                   | <i>Follow-up</i>                | <i>Outcome</i>                                                      | <i>Notes</i>                                                                           |
|-------------------------------------|-------------------------------------------|-------------------------------------------------|---------------------------------|---------------------------------------------------------------------|----------------------------------------------------------------------------------------|
| Fernández-Real et al. <sup>74</sup> | RCT 1:1 to ID or control                  | 28 patients with T2D and hyperferritinemia      | 12 months                       | Reduced HbA1c and insulin resistance, improved insulin secretion    | ID by 3 phlebotomies                                                                   |
| Valenti et al. <sup>53</sup>        | Case-control study                        | 128 patients with NAFLD                         | 6-24 months                     | Reduced insulin resistance in those with ferritin >250 ng/ml        |                                                                                        |
| Zacharski et al. <sup>75</sup>      | RCT: 1:1 to ID or control                 | 1231 patients with peripheral arterial disease  | 6 years                         | Reduced cancer incidence                                            | Secondary analysis of a RCT                                                            |
| Valenti et al. <sup>76</sup>        | PS-matched analysis                       | 198 patients with NAFLD                         | 6-8 months after ID achievement | Reduced insulin resistance and ALT, more frequent ALT normalization |                                                                                        |
| Valenti et al. <sup>77</sup>        | RCT: 1:1 to ID or lifestyle changes alone | 35 patients with NAFLD and hyperferritinemia    | 24 months                       | Reduced AST, ALT, GGT; weight gain; improved liver histology        |                                                                                        |
| Adams et al. <sup>78</sup>          | RCT 1:1 to ID or lifestyle                | 74 patients with NAFLD irrespective of ferritin | 6 months                        | No effect on insulin resistance or ALT                              |                                                                                        |
| Laine et al. <sup>79</sup>          | RCT 1:1 to ID or lifestyle changes        | 274 patients with DIOS                          | 12 months                       | Lack of improvement in insulin resistance; weight gain; reduced ALT | DIOS determined by MRI; insulin resistance main outcome                                |
| Mateo-Gallego et al. <sup>80</sup>  | RCT 1:1 to 3 phlebotomies or control      | 86 patients with hyperferritinemia and hyper-TG | 9 weeks                         | Lack of improvement in TG; improvement in RBP-4                     | Trend for improvement in liver enzymes, larger impact in those who reduced iron stores |

RCT: randomized controlled trial; ID: iron depletion by phlebotomy; NAFLD: nonalcoholic fatty liver disease; PS: propensity score; ALT: alanine aminotransferases; DIOS; dysmetabolic

iron overload syndrome; MRI: magnetic resonance imaging; TG: circulating triglycerides; RBP-4: retinol binding protein-4.

**Supplementary Table 6.** Main research challenges in the metabolic hyperferritinemia (MHF) field.

|                     | <i>Goal</i>                                                                                                                                                                                                                                      | <i>Notes on design</i>                                                                                                                                                                                                                                                                                                                                                                                                                                                                                                                                                                                                                                                                                                                                                                                                                                                                                                                                                                                                                                        |
|---------------------|--------------------------------------------------------------------------------------------------------------------------------------------------------------------------------------------------------------------------------------------------|---------------------------------------------------------------------------------------------------------------------------------------------------------------------------------------------------------------------------------------------------------------------------------------------------------------------------------------------------------------------------------------------------------------------------------------------------------------------------------------------------------------------------------------------------------------------------------------------------------------------------------------------------------------------------------------------------------------------------------------------------------------------------------------------------------------------------------------------------------------------------------------------------------------------------------------------------------------------------------------------------------------------------------------------------------------|
| DIAGNOSIS           | Validate the updated definition. Validate suggested serum ferritin cut-offs.                                                                                                                                                                     | Examine the added clinical value (for risk stratification of clinical events and prediction of response to therapy).                                                                                                                                                                                                                                                                                                                                                                                                                                                                                                                                                                                                                                                                                                                                                                                                                                                                                                                                          |
|                     | Validate non-invasive assessment of iron accumulation and staging.                                                                                                                                                                               | Validation of ferritin levels against tissue iron concentration and clinical outcomes.                                                                                                                                                                                                                                                                                                                                                                                                                                                                                                                                                                                                                                                                                                                                                                                                                                                                                                                                                                        |
| EPIDEMIOLOGY        | Re-assess the prevalence in different ethnic groups and clinical settings.                                                                                                                                                                       | With staging of severity.<br>Assessment of SF reduction after at least 3 months of standardized lifestyle change.                                                                                                                                                                                                                                                                                                                                                                                                                                                                                                                                                                                                                                                                                                                                                                                                                                                                                                                                             |
|                     | Evaluate the interaction between dysmetabolism/IR and alcohol intake in the pathogenesis of MHF.                                                                                                                                                 | Consider also other dietary factors.                                                                                                                                                                                                                                                                                                                                                                                                                                                                                                                                                                                                                                                                                                                                                                                                                                                                                                                                                                                                                          |
|                     | Refine risk factors and develop polygenic risk scores.                                                                                                                                                                                           | Polygenic risk scores may be used in Mendelian randomization studies to estimate the causal role in determining organ-specific complications in observational studies in large cohorts.                                                                                                                                                                                                                                                                                                                                                                                                                                                                                                                                                                                                                                                                                                                                                                                                                                                                       |
|                     |                                                                                                                                                                                                                                                  |                                                                                                                                                                                                                                                                                                                                                                                                                                                                                                                                                                                                                                                                                                                                                                                                                                                                                                                                                                                                                                                               |
| PATHOPHYSIOLOGY     | Identify additional risk loci to improve risk stratification, disease knowledge and identify new therapeutic targets.                                                                                                                            |                                                                                                                                                                                                                                                                                                                                                                                                                                                                                                                                                                                                                                                                                                                                                                                                                                                                                                                                                                                                                                                               |
|                     | Identify at-risk/high-risk phenotypes for carriage of variants of iron genes                                                                                                                                                                     |                                                                                                                                                                                                                                                                                                                                                                                                                                                                                                                                                                                                                                                                                                                                                                                                                                                                                                                                                                                                                                                               |
|                     | Clarify the pathophysiological mechanisms and biological pathways linking iron and lipid/glucose metabolism.                                                                                                                                     |                                                                                                                                                                                                                                                                                                                                                                                                                                                                                                                                                                                                                                                                                                                                                                                                                                                                                                                                                                                                                                                               |
|                     | Clarify the relationship between ferritin levels and markers of subclinical inflammation.                                                                                                                                                        |                                                                                                                                                                                                                                                                                                                                                                                                                                                                                                                                                                                                                                                                                                                                                                                                                                                                                                                                                                                                                                                               |
|                     | Investigate the possible role of hyperferritinemia per se in disease progression (immunological properties of ferritin, its role as pro-inflammatory signaling molecule and iron delivery system, e.g. as iron source and pro-oxidant activity). |                                                                                                                                                                                                                                                                                                                                                                                                                                                                                                                                                                                                                                                                                                                                                                                                                                                                                                                                                                                                                                                               |
| CLINICAL ASSESSMENT | Clarify the specific contribution of deranged iron metabolism vs. tissue-specific accumulation in the pathogenesis of disease outcomes.                                                                                                          | Examine role of iron vs. fat accumulation in the liver, adipose tissue, skeletal muscle, spleen, pancreas.                                                                                                                                                                                                                                                                                                                                                                                                                                                                                                                                                                                                                                                                                                                                                                                                                                                                                                                                                    |
|                     | Standardize clinical assessment and organ damage staging.                                                                                                                                                                                        | It will require demonstration of an impact on the ability to stratify the risk of outcomes.                                                                                                                                                                                                                                                                                                                                                                                                                                                                                                                                                                                                                                                                                                                                                                                                                                                                                                                                                                   |
|                     | Evaluate the diagnostic yield of targeted sequencing of iron metabolism gene panels or other next generation sequencing approaches in patients with DIOS.                                                                                        | It will have clinical implications for the management of patients with DIOS.                                                                                                                                                                                                                                                                                                                                                                                                                                                                                                                                                                                                                                                                                                                                                                                                                                                                                                                                                                                  |
| TREATMENT           | Evaluate the long-term impact of iron depletion (and more generally of modulation of iron status) on metabolic, cardiovascular, neoplastic and hepatic outcomes in well-powered long-term studies.                                               | Design randomized controlled trials stratified for MHF severity (Baseline SF and hepatic iron content) to define the optimal threshold for which iron depletion may be potentially beneficial;<br>Consider stratification for genetic risk factors;<br>Assess after at least 3 months of lifestyle change;<br>Design trials testing the effects of sustained modification of diet and lifestyle habits on ferritin levels and iron stores;<br>Standardize iron depletion protocols and maintenance, and possible support therapies (e.g. folate supplementation);<br>Identify iron depletion/ modulation protocols not affecting the patient's functional capacity;<br>Examine outcomes at least at 3 months after normalization of iron stores;<br>Consider observational studies in blood donors controlling for donation frequency and propensity score;<br>Consider as outcomes incidence of diabetes, major cardiovascular events (markers of atherosclerosis), cancer, liver events (progression of liver fibrosis), patient perceived quality of life. |

## REFERENCES

- 1 Wood, J. C. Estimating tissue iron burden: current status and future prospects. *Br J Haematol* **170**, 15-28, doi:10.1111/bjh.13374 (2015).
- 2 Labranche, R. *et al.* Liver Iron Quantification with MR Imaging: A Primer for Radiologists. *Radiographics* **38**, 392-412, doi:10.1148/rg.2018170079 (2018).
- 3 Henninger, B., Alustiza, J., Garbowski, M. & Gandon, Y. Practical guide to quantification of hepatic iron with MRI. *Eur Radiol* **30**, 383-393, doi:10.1007/s00330-019-06380-9 (2020).
- 4 St Pierre, T. G. *et al.* Noninvasive measurement and imaging of liver iron concentrations using proton magnetic resonance. *Blood* **105**, 855-861, doi:10.1182/blood-2004-01-0177 (2005).
- 5 Wood, J. C. *et al.* MRI R2 and R2\* mapping accurately estimates hepatic iron concentration in transfusion-dependent thalassemia and sickle cell disease patients. *Blood* **106**, 1460-1465, doi:10.1182/blood-2004-10-3982 (2005).
- 6 Henninger, B. *et al.* R2\* relaxometry for the quantification of hepatic iron overload: biopsy-based calibration and comparison with the literature. *Rofo* **187**, 472-479, doi:10.1055/s-0034-1399318 (2015).
- 7 Garbowski, M. W. *et al.* Biopsy-based calibration of T2\* magnetic resonance for estimation of liver iron concentration and comparison with R2 Ferriscan. *J Cardiovasc Magn Reson* **16**, 40, doi:10.1186/1532-429X-16-40 (2014).
- 8 Petitclerc, L., Sebastiani, G., Gilbert, G., Cloutier, G. & Tang, A. Liver fibrosis: Review of current imaging and MRI quantification techniques. *J Magn Reson Imaging* **45**, 1276-1295, doi:10.1002/jmri.25550 (2017).
- 9 Franca, M. *et al.* Accurate simultaneous quantification of liver steatosis and iron overload in diffuse liver diseases with MRI. *Abdom Radiol (NY)* **42**, 1434-1443, doi:10.1007/s00261-017-1048-0 (2017).
- 10 Horng, D. E., Hernando, D. & Reeder, S. B. Quantification of liver fat in the presence of iron overload. *J Magn Reson Imaging* **45**, 428-439, doi:10.1002/jmri.25382 (2017).
- 11 Henninger, B. *et al.* 3D Multiecho Dixon for the Evaluation of Hepatic Iron and Fat in a Clinical Setting. *J Magn Reson Imaging* **46**, 793-800, doi:10.1002/jmri.25630 (2017).
- 12 Tang, A. *et al.* Accuracy of MR imaging-estimated proton density fat fraction for classification of dichotomized histologic steatosis grades in nonalcoholic fatty liver disease. *Radiology* **274**, 416-425, doi:10.1148/radiol.14140754 (2015).
- 13 Lin, H. *et al.* Repurposing ICG enables MR/PA imaging signal amplification and iron depletion for iron-overload disorders. *Sci Adv* **7**, eabl5862, doi:10.1126/sciadv.abl5862 (2021).
- 14 Ahmed, U., Latham, P. S. & Oates, P. S. Interactions between hepatic iron and lipid metabolism with possible relevance to steatohepatitis. *World J Gastroenterol* **18**, 4651-4658, doi:10.3748/wjg.v18.i34.4651 (2012).
- 15 Huang, J. *et al.* Iron regulates glucose homeostasis in liver and muscle via AMP-activated protein kinase in mice. *FASEB J* **27**, 2845-2854, doi:10.1096/fj.12-216929 (2013).
- 16 Simcox, J. A. *et al.* Dietary iron controls circadian hepatic glucose metabolism through heme synthesis. *Diabetes* **64**, 1108-1119, doi:10.2337/db14-0646 (2015).

- 17 Protchenko, O. *et al.* Iron Chaperone Poly rC Binding Protein 1 Protects Mouse Liver From Lipid Peroxidation and Steatosis. *Hepatology* **73**, 1176-1193, doi:10.1002/hep.31328 (2021).
- 18 Wang, H. *et al.* Characterization of ferroptosis in murine models of hemochromatosis. *Hepatology* **66**, 449-465, doi:10.1002/hep.29117 (2017).
- 19 Yu, Y. *et al.* Hepatic transferrin plays a role in systemic iron homeostasis and liver ferroptosis. *Blood* **136**, 726-739, doi:10.1182/blood.2019002907 (2020).
- 20 Li, X. *et al.* Targeting ferroptosis alleviates methionine-choline deficient (MCD)-diet induced NASH by suppressing liver lipotoxicity. *Liver Int* **40**, 1378-1394, doi:10.1111/liv.14428 (2020).
- 21 Du, K. *et al.* Inhibiting xCT/SLC7A11 induces ferroptosis of myofibroblastic hepatic stellate cells but exacerbates chronic liver injury. *Liver Int* **41**, 2214-2227, doi:10.1111/liv.14945 (2021).
- 22 Recalcati, S. *et al.* Differential regulation of iron homeostasis during human macrophage polarized activation. *Eur J Immunol* **40**, 824-835, doi:10.1002/eji.200939889 (2010).
- 23 Corna, G. *et al.* Polarization dictates iron handling by inflammatory and alternatively activated macrophages. *Haematologica* **95**, 1814-1822, doi:10.3324/haematol.2010.023879 (2010).
- 24 Vinchi, F. *et al.* Hemopexin therapy reverts heme-induced proinflammatory phenotypic switching of macrophages in a mouse model of sickle cell disease. *Blood* **127**, 473-486, doi:10.1182/blood-2015-08-663245 (2016).
- 25 Handa, P. *et al.* Iron alters macrophage polarization status and leads to steatohepatitis and fibrogenesis. *J Leukoc Biol* **105**, 1015-1026, doi:10.1002/JLB.3A0318-108R (2019).
- 26 Salaye, L. *et al.* A Low Iron Diet Protects from Steatohepatitis in a Mouse Model. *Nutrients* **11**, doi:10.3390/nu11092172 (2019).
- 27 Wang, C. Y. *et al.* Ablation of Hepatocyte Smad1, Smad5, and Smad8 Causes Severe Tissue Iron Loading and Liver Fibrosis in Mice. *Hepatology* **70**, 1986-2002, doi:10.1002/hep.30780 (2019).
- 28 Folgueras, A. R. *et al.* Matriptase-2 deficiency protects from obesity by modulating iron homeostasis. *Nature communications* **9**, 1350, doi:10.1038/s41467-018-03853-1 (2018).
- 29 Fang, X. *et al.* Dietary intake of heme iron and risk of cardiovascular disease: a dose-response meta-analysis of prospective cohort studies. *Nutr Metab Cardiovasc Dis* **25**, 24-35, doi:10.1016/j.numecd.2014.09.002 (2015).
- 30 Vinchi, F. Non-Transferrin-Bound Iron in the Spotlight: Novel Mechanistic Insights into the Vasculotoxic and Atherosclerotic Effect of Iron. *Antioxid Redox Signal* **35**, 387-414, doi:10.1089/ars.2020.8167 (2021).
- 31 Vinchi, F. *et al.* Atherogenesis and iron: from epidemiology to cellular level. *Frontiers in pharmacology* **5**, 94, doi:10.3389/fphar.2014.00094 (2014).
- 32 Valenti, L. *et al.* Iron Stores, Hcpidin, and Aortic Stiffness in Individuals with Hypertension. *PLoS One* **10**, e0134635, doi:10.1371/journal.pone.0134635 (2015).
- 33 Sciacqua, A. *et al.* Ferritin modifies the relationship between inflammation and arterial stiffness in hypertensive patients with different glucose tolerance. *Cardiovasc Diabetol* **19**, 123, doi:10.1186/s12933-020-01102-8 (2020).



- 34 Prats-Puig, A. *et al.* Serum Ferritin Relates to Carotid Intima-Media Thickness in Offspring of Fathers With Higher Serum Ferritin Levels. *Arterioscler Thromb Vasc Biol* **36**, 174-180, doi:10.1161/ATVBAHA.115.306396 (2016).
- 35 Fidelis, H. G. *et al.* Blockade of angiotensin AT1 receptors prevents arterial remodelling and stiffening in iron-overloaded rats. *Br J Pharmacol* **177**, 1119-1130, doi:10.1111/bph.14904 (2020).
- 36 Ramakrishnan, L. *et al.* The Hepcidin/Ferroportin axis modulates proliferation of pulmonary artery smooth muscle cells. *Sci Rep* **8**, 12972, doi:10.1038/s41598-018-31095-0 (2018).
- 37 Xiao, L. *et al.* Macrophage iron retention aggravates atherosclerosis: Evidence for the role of autocrine formation of hepcidin in plaque macrophages. *Biochim Biophys Acta Mol Cell Biol Lipids* **1865**, 158531, doi:10.1016/j.bbalip.2019.158531 (2020).
- 38 Li, J. J. *et al.* Hepcidin destabilizes atherosclerotic plaque via overactivating macrophages after erythrophagocytosis. *Arterioscler Thromb Vasc Biol* **32**, 1158-1166, doi:10.1161/ATVBAHA.112.246108 (2012).
- 39 Vinchi, F. *et al.* Atherosclerosis is aggravated by iron overload and ameliorated by dietary and pharmacological iron restriction. *Eur Heart J* **41**, 2681-2695, doi:10.1093/eurheartj/ehz112 (2020).
- 40 Valenti, L. *et al.* Serum ferritin levels are associated with vascular damage in patients with nonalcoholic fatty liver disease. *Nutr Metab Cardiovasc Dis* **21**, 568-575, doi:10.1016/j.numecd.2010.01.003 (2011).
- 41 Valenti, L. *et al.* Serum hepcidin and macrophage iron correlate with MCP-1 release and vascular damage in patients with metabolic syndrome alterations. *Arterioscler Thromb Vasc Biol* **31**, 683-690, doi:10.1161/ATVBAHA.110.214858 (2011).
- 42 Santini, V. *et al.* Hepcidin levels and their determinants in different types of myelodysplastic syndromes. *PLoS One* **6**, e23109, doi:10.1371/journal.pone.0023109 (2011).
- 43 Rametta, R. *et al.* Impact of natural neuromedin-B receptor variants on iron metabolism. *Am J Hematol* **95**, 167-177, doi:10.1002/ajh.25679 (2020).
- 44 Nascimbeni, F. *et al.* AISF update on the diagnosis and management of adult-onset lysosomal storage diseases with hepatic involvement. *Dig Liver Dis* **52**, 359-367, doi:10.1016/j.dld.2019.12.005 (2020).
- 45 Marchi, G. *et al.* Hyperferritinemia and diagnosis of type 1 Gaucher disease. *Am J Hematol* **95**, 570-576, doi:10.1002/ajh.25752 (2020).
- 46 European Association For The Study Of The, L. EASL clinical practice guidelines for HFE hemochromatosis. *J Hepatol* **53**, 3-22, doi:10.1016/j.jhep.2010.03.001 (2010).
- 47 Corradini, E., Buzzetti, E. & Pietrangelo, A. Genetic iron overload disorders. *Molecular aspects of medicine* **75**, 100896, doi:10.1016/j.mam.2020.100896 (2020).
- 48 European Association for the Study of the Liver. Electronic address, e. e. e. & European Association for the Study of the, L. EASL Clinical Practice Guidelines on haemochromatosis. *J Hepatol* **77**, 479-502, doi:10.1016/j.jhep.2022.03.033 (2022).
- 49 Corradini, E. *et al.* Ceruloplasmin gene variants are associated with hyperferritinemia and increased liver iron in patients with NAFLD. *J Hepatol* **75**, 506-513, doi:10.1016/j.jhep.2021.03.014 (2021).
- 50 Viveiros, A. *et al.* MRI-Based Iron Phenotyping and Patient Selection for Next-Generation Sequencing of Non-Homeostatic Iron Regulator Hemochromatosis Genes. *Hepatology* **74**, 2424-2435, doi:10.1002/hep.31982 (2021).

- 51 Wlazlo, N. *et al.* Iron metabolism is associated with adipocyte insulin resistance and plasma adiponectin: the Cohort on Diabetes and Atherosclerosis Maastricht (CODAM) study. *Diabetes Care* **36**, 309-315, doi:10.2337/dc12-0505 (2013).
- 52 Haap, M. *et al.* Insulin sensitivity and liver fat: role of iron load. *J Clin Endocrinol Metab* **96**, E958-961, doi:10.1210/jc.2010-2682 (2011).
- 53 Valenti, L. *et al.* Iron depletion by phlebotomy improves insulin resistance in patients with nonalcoholic fatty liver disease and hyperferritinemia: evidence from a case-control study. *Am J Gastroenterol* **102**, 1251-1258, doi:10.1111/j.1572-0241.2007.01192.x (2007).
- 54 Zheng, X. *et al.* Hepatic iron stores are increased as assessed by magnetic resonance imaging in a Chinese population with altered glucose homeostasis. *Am J Clin Nutr* **94**, 1012-1019, doi:10.3945/ajcn.111.015743 (2011).
- 55 Ma, H. *et al.* Serum ferritin levels are associated with insulin resistance in Chinese men and post-menopausal women: the Shanghai Changfeng study. *Br J Nutr* **120**, 863-871, doi:10.1017/S0007114518002167 (2018).
- 56 Suarez-Ortegon, M. F. *et al.* Ferritin, metabolic syndrome and its components: A systematic review and meta-analysis. *Atherosclerosis* **275**, 97-106, doi:10.1016/j.atherosclerosis.2018.05.043 (2018).
- 57 Acton, R. T. *et al.* Relationships of serum ferritin, transferrin saturation, and HFE mutations and self-reported diabetes in the Hemochromatosis and Iron Overload Screening (HEIRS) study. *Diabetes Care* **29**, 2084-2089, doi:10.2337/dc05-1592 (2006).
- 58 Diaz-Lopez, A. *et al.* Association between Iron Status and Incident Type 2 Diabetes: A Population-Based Cohort Study. *Nutrients* **12**, doi:10.3390/nu12113249 (2020).
- 59 Jiang, L. *et al.* Sex-Specific Association of Circulating Ferritin Level and Risk of Type 2 Diabetes: A Dose-Response Meta-Analysis of Prospective Studies. *J Clin Endocrinol Metab* **104**, 4539-4551, doi:10.1210/jc.2019-00495 (2019).
- 60 Cheng, Y. *et al.* The association of elevated serum ferritin concentration in early pregnancy with gestational diabetes mellitus: a prospective observational study. *Eur J Clin Nutr* **74**, 741-748, doi:10.1038/s41430-019-0542-6 (2020).
- 61 Zhang, X. *et al.* Association between maternal plasma ferritin concentration, iron supplement use, and the risk of gestational diabetes: a prospective cohort study. *Am J Clin Nutr* **114**, 1100-1106, doi:10.1093/ajcn/nqab162 (2021).
- 62 Sun, C. *et al.* Association between the ferritin level and risk of gestational diabetes mellitus: A meta-analysis of observational studies. *J Diabetes Investig* **11**, 707-718, doi:10.1111/jdi.13170 (2020).
- 63 Nelson, J. E. *et al.* Relationship between the pattern of hepatic iron deposition and histological severity in nonalcoholic fatty liver disease. *Hepatology* **53**, 448-457, doi:10.1002/hep.24038 (2011).
- 64 Valenti, L. *et al.* HFE genotype, parenchymal iron accumulation, and liver fibrosis in patients with nonalcoholic fatty liver disease. *Gastroenterology* **138**, 905-912, doi:10.1053/j.gastro.2009.11.013 (2010).
- 65 Buzzetti, E. *et al.* Evaluating the association of serum ferritin and hepatic iron with disease severity in non-alcoholic fatty liver disease. *Liver Int* **39**, 1325-1334, doi:10.1111/liv.14096 (2019).

- 66 Valenti, L. *et al.* Beta-globin mutations are associated with parenchymal siderosis and fibrosis in patients with non-alcoholic fatty liver disease. *J Hepatol* **53**, 927-933, doi:10.1016/j.jhep.2010.05.023 (2010).
- 67 He, H. *et al.* Causal relationships between metabolic-associated fatty liver disease and iron status: two-sample Mendelian randomization. *Liver Int*, doi:10.1111/liv.15455 (2022).
- 68 An, P. *et al.* Elevated serum transaminase activities were associated with increased serum levels of iron regulatory hormone hepcidin and hyperferritinemia risk. *Sci Rep* **5**, 13106, doi:10.1038/srep13106 (2015).
- 69 Sorrentino, P. *et al.* Liver iron excess in patients with hepatocellular carcinoma developed on non-alcoholic steato-hepatitis. *J Hepatol* **50**, 351-357, doi:10.1016/j.jhep.2008.09.011 (2009).
- 70 Eder, S. K. *et al.* Mesenchymal iron deposition is associated with adverse long-term outcome in non-alcoholic fatty liver disease. *Liver Int* **40**, 1872-1882, doi:10.1111/liv.14503 (2020).
- 71 Abbate, M. *et al.* Albuminuria Is Associated with Hepatic Iron Load in Patients with Non-Alcoholic Fatty Liver Disease and Metabolic Syndrome. *J Clin Med* **10**, doi:10.3390/jcm10143187 (2021).
- 72 Wu, Y. H. *et al.* Serum Ferritin Independently Predicts the Incidence of Chronic Kidney Disease in Patients with Type 2 Diabetes Mellitus. *Diabetes Metab Syndr Obes* **13**, 99-105, doi:10.2147/DMSO.S228335 (2020).
- 73 Kadoglou, N. P. E. *et al.* The association of ferritin with cardiovascular and all-cause mortality in community-dwellers: The English longitudinal study of ageing. *PLoS One* **12**, e0178994, doi:10.1371/journal.pone.0178994 (2017).
- 74 Fernandez-Real, J. M. *et al.* Blood letting in high-ferritin type 2 diabetes: effects on insulin sensitivity and beta-cell function. *Diabetes* **51**, 1000-1004, doi:10.2337/diabetes.51.4.1000 (2002).
- 75 Zacharski, L. R. *et al.* Decreased cancer risk after iron reduction in patients with peripheral arterial disease: results from a randomized trial. *J Natl Cancer Inst* **100**, 996-1002, doi:10.1093/jnci/djn209 (2008).
- 76 Valenti, L. *et al.* Venesection for non-alcoholic fatty liver disease unresponsive to lifestyle counselling--a propensity score-adjusted observational study. *QJM* **104**, 141-149, doi:10.1093/qjmed/hcq170 (2011).
- 77 Valenti, L. *et al.* A randomized trial of iron depletion in patients with nonalcoholic fatty liver disease and hyperferritinemia. *World J Gastroenterol* **20**, 3002-3010, doi:10.3748/wjg.v20.i11.3002 (2014).
- 78 Adams, L. A. *et al.* The impact of phlebotomy in nonalcoholic fatty liver disease: A prospective, randomized, controlled trial. *Hepatology* **61**, 1555-1564, doi:10.1002/hep.27662 (2015).
- 79 Laine, F. *et al.* Metabolic and hepatic effects of bloodletting in dysmetabolic iron overload syndrome: A randomized controlled study in 274 patients. *Hepatology* **65**, 465-474, doi:10.1002/hep.28856 (2017).
- 80 Mateo-Gallego, R. *et al.* Efficacy of repeated phlebotomies in hypertriglyceridemia and iron overload: A prospective, randomized, controlled trial. *J Clin Lipidol* **12**, 1190-1198, doi:10.1016/j.jacl.2018.06.017 (2018).
